# Supplementary material
Source: MDPI journal article supplement (https://www.mdpi.com/2073-4441/14/20/3335)
Supplement: s1 [file s1]

**Table S1.** Statistical significance between algae and moss species in relation to the elements analyzed.

| Student's T-test |                    |        |    |                  |
|------------------|--------------------|--------|----|------------------|
| Element          | Species comparison | t      | df | p                |
| Fe               | Pp vs Ps           | -4.92  | 8  | <b>0.001</b>     |
|                  | Pp vs Sp           | -7.02  | 8  | <b>&lt;0.001</b> |
|                  | Pp vs Dp           | -4.91  | 8  | <b>0.001</b>     |
|                  | Pl vs Sp           | 0.307  | 8  | 0.767            |
|                  | Pl vs Dp           | 0.856  | 8  | 0.417            |
|                  | Sp vs Dp           | 0.711  | 8  | 0.498            |
| Ni               | Pp vs Ps           | -5.56  | 8  | <b>0.001</b>     |
|                  | Pp vs Sp           | -3.10  | 8  | <b>&lt;0.05</b>  |
|                  | Pp vs Dp           | -3.33  | 8  | <b>0.010</b>     |
|                  | Pl vs Sp           | 1.94   | 8  | 0.089            |
|                  | Pl vs Dp           | 1.48   | 8  | 0.177            |
|                  | Sp vs Dp           | -0.349 | 8  | 0.736            |
| Cu               | Pp vs Ps           | -4.04  | 8  | <b>&lt;0.01</b>  |
|                  | Pp vs Sp           | -4.46  | 8  | <b>&lt;0.01</b>  |
|                  | Pp vs Dp           | -2.10  | 8  | 0.069            |
|                  | Pl vs Sp           | -0.292 | 8  | 0.777            |
|                  | Pl vs Dp           | 1.41   | 8  | 0.196            |
|                  | Sp vs Dp           | 1.71   | 8  | 0.126            |
| Zn               | Pp vs Ps           | -3.55  | 8  | <b>&lt;0.01</b>  |
|                  | Pp vs Sp           | -4.23  | 8  | <b>&lt;0.01</b>  |
|                  | Pp vs Dp           | -3.43  | 8  | <b>&lt;0.01</b>  |
|                  | Pl vs Sp           | 0.372  | 8  | 0.719            |
|                  | Pl vs Dp           | 0.566  | 8  | 0.587            |
|                  | Sp vs Dp           | 0.248  | 8  | 0.811            |
| Cd               | Pp vs Ps           | -3.83  | 8  | <b>&lt;0.01</b>  |
|                  | Pp vs Sp           | -4.53  | 8  | <b>&lt;0.01</b>  |
|                  | Pp vs Dp           | -3.55  | 8  | <b>&lt;0.01</b>  |
|                  | Pl vs Sp           | -0.236 | 8  | 0.819            |
|                  | Pl vs Dp           | 0.679  | 8  | 0.516            |
|                  | Sp vs Dp           | 0.973  | 8  | 0.359            |

| Pb                  | Pp vs Ps           | -1.98  | 8    | 0.083 |
|---------------------|--------------------|--------|------|-------|
|                     | Pp vs Sp           | -1.71  | 8    | 0.125 |
|                     | Pp vs Dp           | -1.73  | 8    | 0.121 |
|                     | Pl vs Sp           | 0.221  | 8    | 0.831 |
|                     | Pl vs Dp           | 0.207  | 8    | 0.841 |
|                     | Sp vs Dp           | -0.014 | 8    | 0.989 |
| Mann-Whitney U-test |                    |        |      |       |
| Element             | Species comparison | U      | Z    | p     |
| Mn                  | Pp vs Sp           | 12.0   | 0.00 | 1.00  |

*p* values in **bold** are statistically significant
